# Supplementary material for: Invasion by the Alien Tree Prunus serotina Alters Ecosystem Functions in a Temperate Deciduous Forest
Source: PubMed Central journal article supplement (PMC5307375; doi:10.3389/fpls.2017.00179), 2017-02-14
Supplement: Presentation2.pdf [file Presentation2.pdf]

# PROTOCOL

## Litter and soil respiration

DIARS-PR-RA-20150218

Date

18/02/2015

### 1. Hardware

#### 1.0. Air-tight jars fitted with two valves (Fig 1).

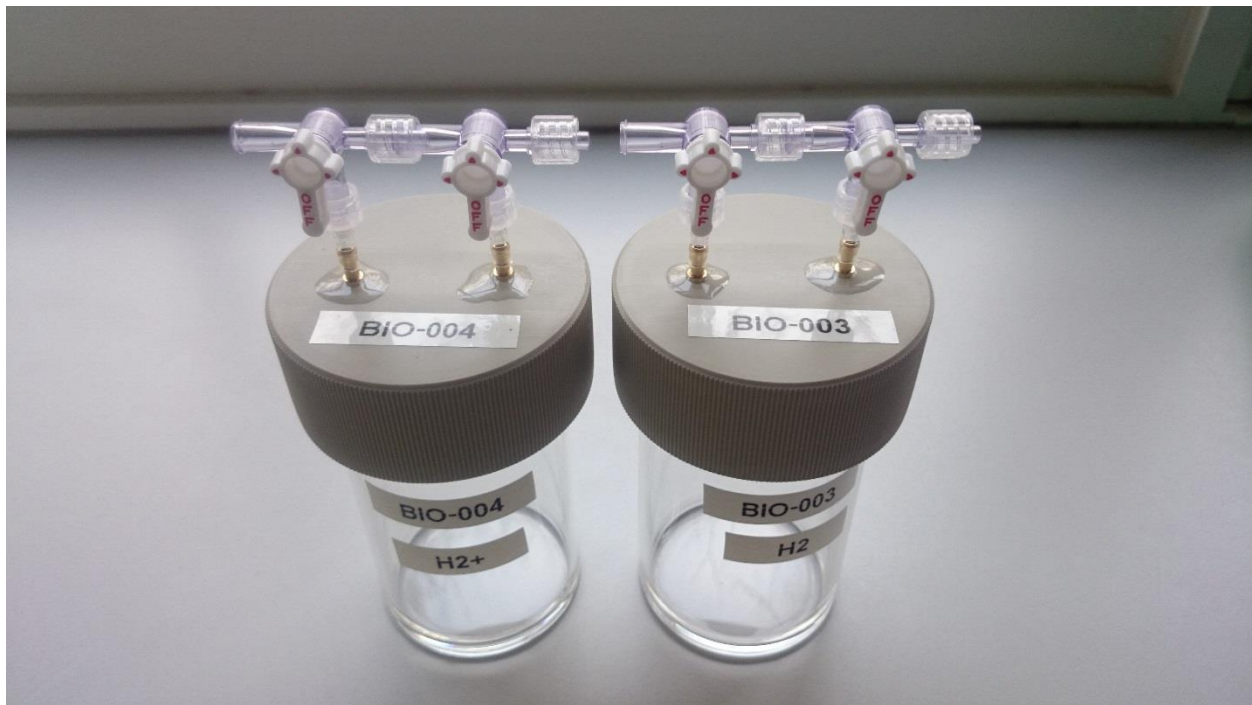

Fig. 1. Air-tight jars for litter decomposition measurement ( $V=287$  ml)

#### 1.0.1. The number of jars needed $N_j = (\text{number of selected plots} \times 2) + 3$

There are 2 jars per plot: 1 with litter, 1 without litter. There are 4 blanc jars. Two blancs are used to measure atmospheric  $\text{CO}_2$  concentrations. Two other blancs are used as references with soil samples.

#### 1.0.2. Before starting the experiment, all jars need to be tested for air-tightness by pressurizing the jars and checking for pressure loss using a manometer.

#### 1.0.3. The exact volume of the jars is to be known. The BIO jars have a volume of 287 ml.

## 1.1. Incubation room

- 1.1.1. The space to store *Nj* jars is a room with ambient room temperature set at 25°C. There is a such a room in the FBIW/EES Soil and Water lab.
- 1.1.2. The incubation room should be a dark room to prevent algae growth (algae consume CO<sub>2</sub>).

## 1.2. LiCOR820 IR CO<sub>2</sub> sensor

- 1.2.1. The LiCOR820 IR CO<sub>2</sub> sensor should be modified to allow closed-circuit measuring. There is a modified LiCOR CO<sub>2</sub> sensor in the Eric Smolders soil and water lab.

## 2. Soil preparation

### 2.0. Soil sample selection

#### 2.1. Soil samples are dried.

- 2.1.1. Soil samples are first air-dried.
- 2.1.2. Prior to density measurement and subsampling, soil samples are oven-dried at 50°C for 24 hrs (step added because some samples still felt moist even after months of air-drying).

#### 2.2. Determine air-dry soil sample bulk density and oven-dry organic matter content.

- 2.2.1. Use dry soil.
- 2.2.2. Loosely fill container with known volume with dry soil (do not compress). **BD Cup = 73 cm<sup>3</sup>**
- 2.2.3. Weigh soil (in g).
- 2.2.4. Determine bulk density BD as *weight soil/volume container* (g/cm<sup>3</sup>).
- 2.2.5. Repeat 3 times and calculate average BD.

#### 2.3. Prepare 2 subsamples of a given weight.

- 2.3.1. The weight of the subsample is determined by the jar dimensions. The compacted soil depth (to standard bulk density of 1.5 g/cm<sup>3</sup>) in jar should be 1 cm. Therefore the weight of the subsample is  $1.5 \text{ g/cm}^3 \times 1 \text{ cm} \times S \text{ cm}^2$  g with *S* the inner bottom surface area of the jar. **BIO jars S = 26.69 cm<sup>2</sup>. Subsample weight = 40.04 g**
- 2.3.2. The two air-dried soil subsamples are transferred to two jars: one sample to jar XN (jar without litter), one sample to jar XN+ (jar with litter)

#### 2.4. Determine soil organic matter content (%)

- 2.4.1. Determine weight of empty oven cups (one cup per sample) (g)
- 2.4.2. Fill half of the cup with soil
- 2.4.3. Oven-dry soil samples (50°C – 24 hours)

- 2.4.4. Switch on Muffle oven (takes one hour to reach operation temperature)
- 2.4.5. Determine filled weight of cups (g)
- 2.4.6. Incubate cups in Muffle oven (3 hours) – **CAUTION – HOT OVEN!**
- 2.4.7. Remove cups from Muffle oven and let cool down until manageable – **CAUTION – HOT!**
- 2.4.8. Determine (still warm) weight of cups with heat-treated samples.

2.5. The soils in jars are moisturized to attain a water filled pore space  $WFPS = 60\%$ . Use **demineralized** DEMI water.

2.5.1. The volume of water to be added is calculated as follows:

$$WFPS = (\text{volumetric water content}/\text{soil porosity}) \times 100 = 60$$

$$\text{Soil porosity} = 1 - (\text{bulk density}/2.65)$$

$$\text{Thus: VWC} = 0.60 \times [1 - (\text{bulk density}/2.65)]$$

$$\text{volume of water to be added (in ml)} = \text{VWC (ml/cm}^3) \times \text{soil volume (cm}^3)$$

$$\text{Thus: volume of water to be added (in ml)} = \text{VWC (ml/cm}^3) \times (40 \text{ g}/\text{BD (g/cm}^3))$$

2.6. The jars are incubated for 12 days at 25°C.

2.6.1. Jar valves are open to allow free flux of soil respiration  $\text{CO}_2$  to the atmosphere.

2.7. At the end of the incubation period, soil is compacted to standard bulk density of 1.5  $\text{g/cm}^3$ .

2.7.1. The standard bulk density is attained by compacting the soil to a set height of 1 cm in jar.

### 3. Litter preparation

3.0. Oven-dry litter samples

3.1. Mill oven-dry litter samples (using DOMO DO443BL blender) and homogenize

3.1.1. The mill is cleaned after the milling of each sample.

3.2. Milled samples are sieved over a 250  $\mu\text{m}$  mesh (to remove mineral fraction).

**3.2.1.** The sieve is cleaned with a brush after the sieving of each sample.

**3.3.** Prepare litter subsamples

**3.3.1.** The litter subsample should be proportional to the litter quantity in the forest (dry litter weight in g/m<sup>2</sup>). As litter samples were collected from 50×50 cm<sup>2</sup> = 2500 cm<sup>2</sup>, the quantity of litter to be subsampled is determined by the jar dimensions as follows:

$$\text{Subsample dry weight} = \text{complete sample dry weight} \times (\text{inside jar bottom surface area } S \text{ in cm}^2 / 2500 \text{ cm}^2) = \text{sample dry weight} \times (26.69 / 2500)$$

**3.4.** Transfer litter to jar XN+ (jar with litter).

**3.4.1.** Match and double-check litter sample and soil in jar.

**3.4.2.** The litter is evenly spread out over the compacted soil in the jar.

**3.5.** Incubate litter samples.

**3.5.1.** Jar valves are closed to capture litter decomposition CO<sub>2</sub>.

**3.5.2.** At closing of valves, record decomposition start time

## 4. Monitor litter decomposition

### 4.1. Measure and record CO<sub>2</sub> concentration using LiCOR820

4.1.1. The frequency of measurement follows a set monitoring scheme

4.1.2. A. If decomposition is slow (CO<sub>2</sub> concentrations at monitoring moments below 2%), measure in closed circuit following soil and water lab procedure. Chosen method cannot change during experiment.

B. If decomposition is fast (CO<sub>2</sub> concentrations at monitoring moments above 2%), measure in open circuit after dilution with pure O<sub>2</sub> following soil and water lab procedure. Chosen method cannot change during experiment.

4.1.3. At time of CO<sub>2</sub> measurement, record time

4.1.4. After measurement, allow CO<sub>2</sub> concentration to drop to atmospheric background level.

4.1.5. Measure and record atmospheric background level.

4.1.6. Close valves and move jar back to incubation room.

## 5. Reconstruct CO<sub>2</sub> emission curves

5.1.1. See files DECO-experiment1.xls, DECO-experiment2.xls, DECO-experiment3.xls
